# Supplementary material for: Preparation and functionalization of hydride terminated porous germanium
Source: Royal Society of Chemistry journal article supplement (doi:10.1039/b004011h), 2000-01-01
Supplement: b004011h.pdf [file b004011h.pdf]

## Supplementary information

### Preparation and functionalization of hydride terminated porous germanium

Hee Cheul Choi and Jillian M. Buriak\*

Department of Chemistry, 1393 Brown Laboratories, Purdue University, West Lafayette, IN 47907-1393

E-mail: buriak@purdue.edu

### Thermal stability

The native  $\text{Ge-H}_x$  terminated surface is surprisingly resistant to boiling aqueous conditions, in light of the known instability of  $\text{Ge-H}_x$  groups on flat surfaces under ambient conditions. PG was immersed in aerated boiling water, with or without 25% v/v of ethanol for 5, 10, 20, and 70 min which resulted in a ~50% decrease of total  $\text{Ge-H}_x$  intensities (Fig. SI1a). Thermal oxidation in air at 100 °C also showed little effect after 1 h, but after 12 h, the  $\text{Ge-H}_x$  vibrations are essentially removed (Fig SI1b).

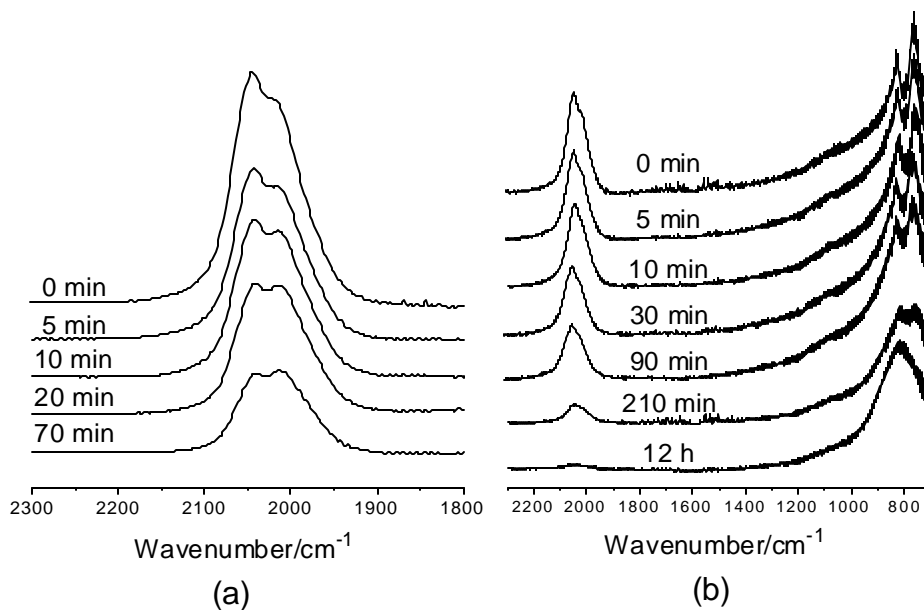

**Fig. SI1** FTIR studies of stability tests of PG in boiling water (a) and in oven at 100 °C (b).

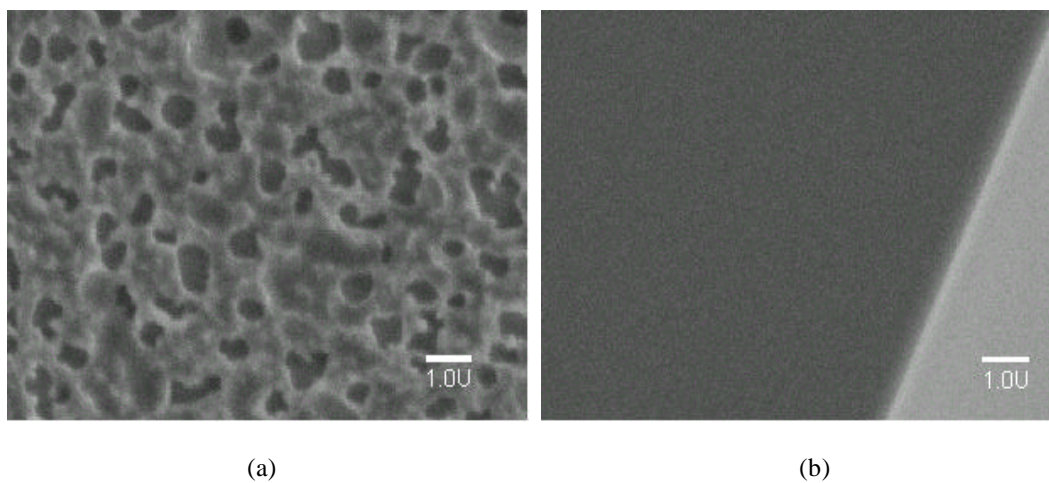

**Fig. SI2** SEM of the surface features of n<sup>+</sup> type germanium after (a) 2 min and (b) 5 min anodization under 350 mA/cm<sup>2</sup>. Oxide layer formed during first 2 min of anodization dissolved during next 3 min of anodization. Diagonally fractured top surface was included in (b) in order to compare the cleanliness of the top surface.

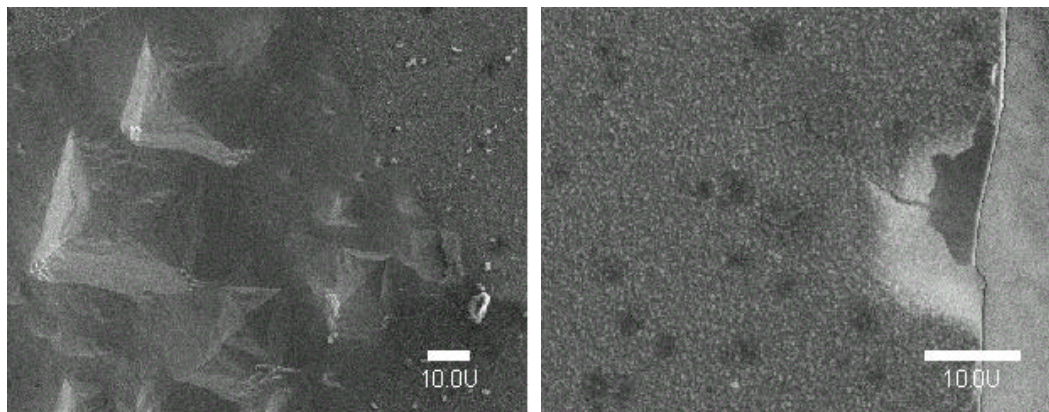

(a)

(b)

**Fig. SI3** SEM (plan view) of  $n^+$  type PG. Pyramidal shape surface features (a) and nanoparticles (b) are shown.

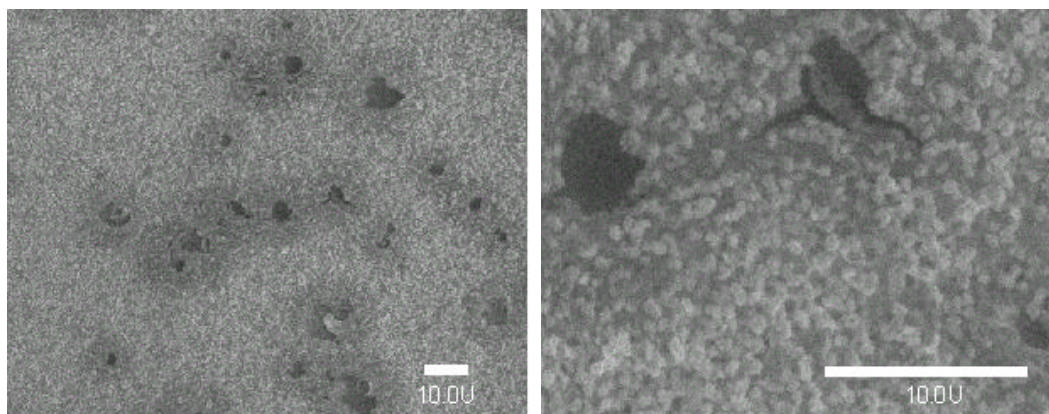

(a)

(b)

**Fig. SI4** SEM of the plan view of p type PG. Submicron-sized particles were found around the edge of the sample. Fractured areas and nanoparticles are seen under lower (a) and higher magnification (b).

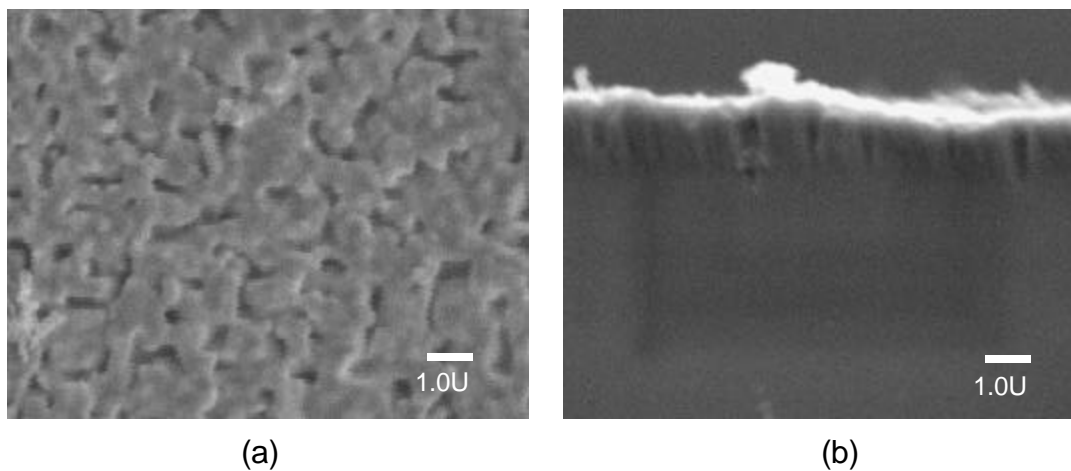

**Fig. S15** Plan and cross-sectional view of (a and (b) p type derived PG.
